# Supplementary material for: Microbial Risk Assessment of Tidal−Induced Urban Flooding in Can Tho City (Mekong Delta, Vietnam)
Source: MDPI journal article supplement (doi:10.3390/ijerph14121485), 2017-11-30
Supplement: s1 [file s1]

# Microbial Risk Assessment of Tidal-Induced Urban Flooding in Can Tho City (Mekong Delta, Vietnam)

Hong Quan Nguyen <sup>1,\*</sup>, Thi Thao Nguyen Huynh <sup>1,2</sup>, Assela Pathirana <sup>2</sup> and Peter Van der Steen <sup>2</sup>

<sup>1</sup> Center of Water Management and Climate Change (WACC), Viet Nam National University—Ho Chi Minh City (VNU—HCM), Ho Chi Minh City 12345, Vietnam; n.huynh@un-ihe.org

<sup>2</sup> IHE Delft Institute for Water Education, Delft 2611 AX, The Netherlands; a.pathirana@un-ihe.org (A.P.); p.vandersteen@un-ihe.org (P.V.d.S.)

\* Correspondence: hongquanmt@yahoo.com; Tel.: +84-908-275-996

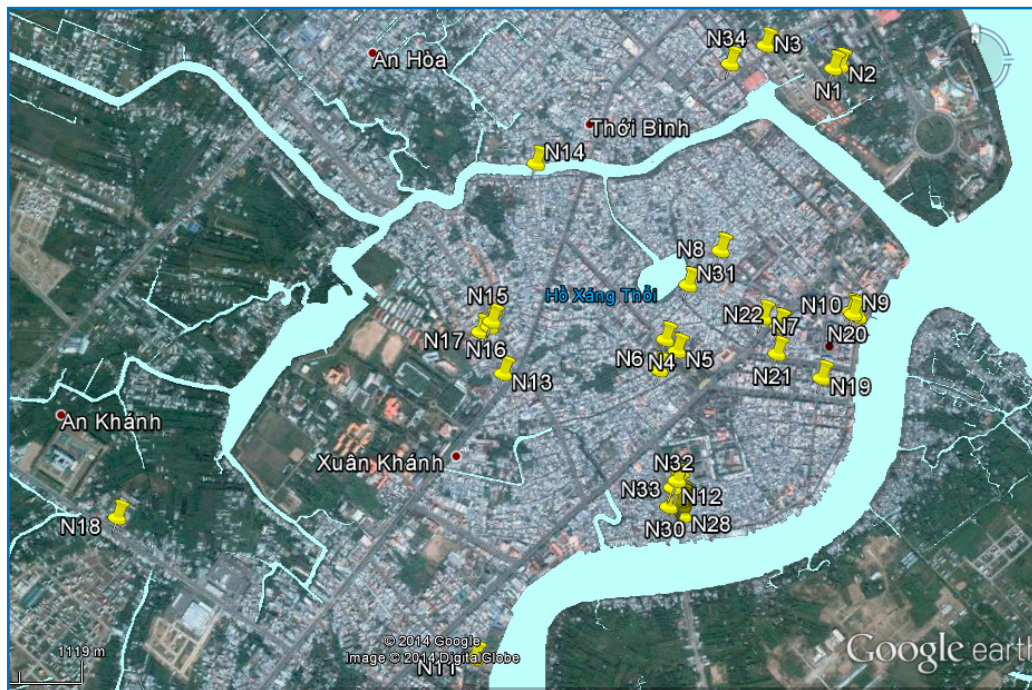

Figure S1: Locations of the 34 households interviewed

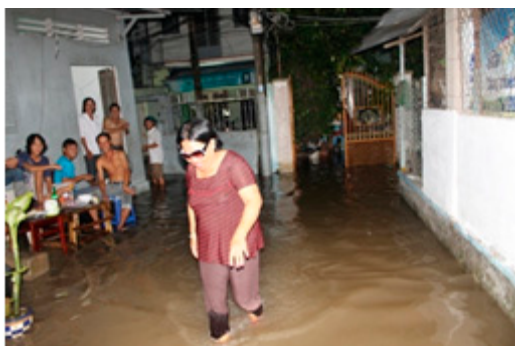

(a)

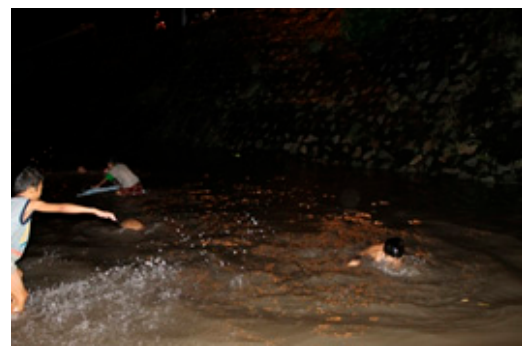

(b)

Figure S2: Ingested flood water while (a) walking in a flooded street; (b) playing on a flooded street.

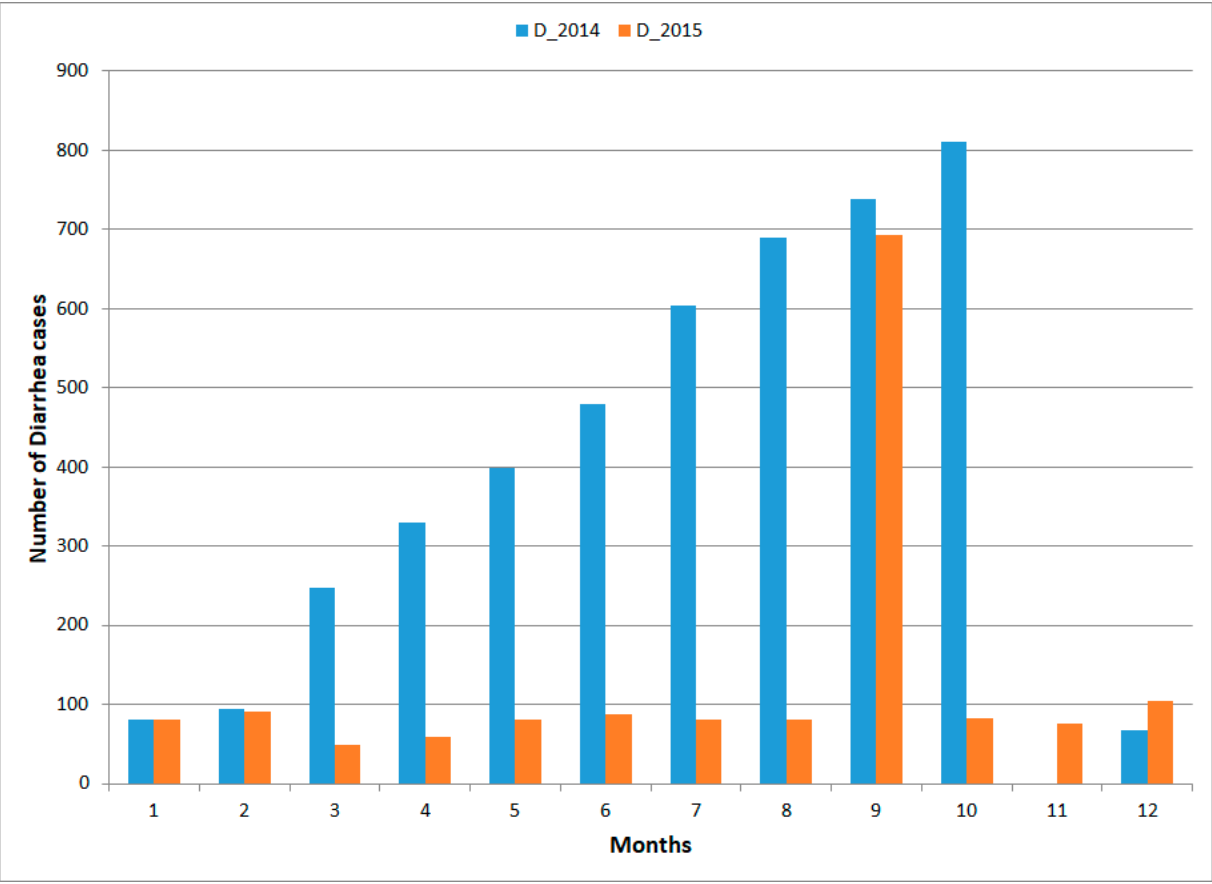

Figure S3: Number of diarrhea cases during 2014, 2015 (Source: Report of Can Tho Preventive Health Care)
